# Supplementary material
Source: PubMed Central journal article supplement (PMC3010368)
Supplement: NIHMS258448-supplement-01.pdf [file NIHMS258448-supplement-01.pdf]

**Table S1.** Primers used for sequencing of *Lamc1* and *Lamc2*.

| Name       | Sequence                  |
|------------|---------------------------|
| Lamc1.1F   | AGTTTGTTAATGCCGCCTTCAA    |
| Lamc1.2R   | GCGCACGTAAGTGATGTCAAA     |
| Lamc1.3F   | ATGAAGTGTTTAACGACCCCAAAGT |
| Lamc1.4    | (AG)CGGCCGGTCATTGAAGAAA   |
| Lamc1.5F   | GCCGATCCCAAGAGTGCTAC      |
| Lamc1.6R   | GCATCTGCCGTAACGTGTCACA    |
| Lamc1.7F   | CAGCACAGACGAGTGTAATGTTGA  |
| Lamc1.8R   | GCCAACAGCATTGTGCACA       |
| Lamc1.9F   | GCGCGTGGAGCAGAGAGA        |
| Lamc1.10R  | AAAGATTCTGCCCATAACTCAGGA  |
| Lamc1.11F  | GCTCTCTCCCCGTTTGAATTT     |
| Lamc1.12R  | AGCACTTTGCAAGGTGACATCA    |
| Lamc1.13F  | GCCCCACTGTGAGAAATGTAG     |
| Lamc1.14R  | AGTCTCACAGGCCCATGCT       |
| Lamc1.15F  | TGCAGCAACAGAGCAGCTGTAA    |
| Lamc1.16R  | ACACTGCCCATGTTGGTGAA      |
| Lamc1.17F  | TCCCTTTCCTCCAGTGTAAGAGG   |
| Lamc1.18R  | CTGGAGTTTCACTCGATGCTCAG   |
| Lamc1.19F  | GATCGCCTTCAGAGAGTAAATAGCA |
| Lamc1.20R  | GTTGTTTGGCTCCCCTGTAGACT   |
| Lamc1.121F | GATGACATTGTACGAGTGGCAAA   |

1  
2  
3  
4  
5  
6  
7  
8  
9  
10  
11  
12  
13  
14  
15  
16  
17  
18  
19  
20  
21  
22  
23  
24  
25  
26  
27  
28  
29  
30  
31  
32  
33  
34  
35  
36  
37  
38  
39  
40  
41  
42  
43  
44  
45  
46  
47  
48  
49  
50  
51  
52  
53  
54  
55  
56  
57  
58  
59  
60

|           |                                        |
|-----------|----------------------------------------|
| Lamc1.22R | CCTGCTTCTCCAGGTCCTGAG                  |
| Lamc1.23F | AAATAAAATCAAGAAAGAAGCTGCAGA            |
| Lamc1.24R | AGCTTCTTCAGCAAGGGCCTT                  |
| Lamc1.25F | ATAACAAGACAGCCGCGGAA                   |
| Lamc1.26R | GTTCTTTCTGCGTCCGCCTT                   |
| Lamc1.27F | CAATGCCAGAAAGGCCAAAAA                  |
| Lamc1.28R | CCGGTTATAGTCCATGATGGCT                 |
| Lamc1.R   | AAGGGTTACAAATATTCAGATTTTATTATAAAATAAAA |
| Lamc2F    | GCCACCTCCAGGAGGGAAGT                   |
| Lamc2R    | TCACTGTTGCTCAAGAGCTTGG                 |
| Lamc2.2F  | GCTCAGCTGCTGCCTTGGT                    |
| Lamc2.4R  | TTTGTCTGTCACACCTGGCTTA                 |
| Lamc2.5F  | GTGACCCAGCTGGCATCTCT                   |
| Lamc2.7R  | TCTGATCTTCGGGCAGAACTAAAC               |
| Lamc2.8F  | CGCGTGGACAGAGGAGGTA                    |
| Lamc2.9F  | GCTGTGAGGTTCCGCAGTAAC                  |
| Lamc2.10F | CCCGCCCTGTCTCTGGA                      |
| Lamc2.11R | CAGCACACTCAATGTCAGGATTCT               |
| Lamc2.12F | AGCTCTGTGCTGATGGCTTCTTT                |
| Lamc2.13R | CACCTCGACACTCTCCAGGCT                  |
| Lamc2.14F | AGCAGCTCCAGAGCCTGGAG                   |
| Lamc2.15R | GTTCTCTTGGCTCCTTGCCTT                  |
| Lamc2.16F | CACTACGTGGGGCCGAAT                     |

1  
2  
3 Lamc2.18R GCTCAGGGACTTGGTTTTCTCTAA  
4  
5 Lamc2.19F AGACAAAAGGCTGATTCTCTCTCAA  
6  
7  
8 Lamc2.20 CAAGGTTGGCACGGGAAA  
9  
10 Lamc2.21F GAAGACAGAAAAGCAGAGGCTGAA  
11  
12 Lamc2.22R CTGCTGTCACATTAGCTTCCAAGTT  
13  
14  
15 Lamc2.23F CTGATGCCAGAGCCACGAGT  
16  
17  
18 Lamc2.24R GGCCGAAGTCGACTGTTGA  
19  
20 Lamc2b.F CGACAGACAGGCAGCGGGT  
21  
22 Lamc2b.R CTGGGTCTTGTCACTGGCATC  
23  
24 In2Ex2FWD CACCTCCAGGAGGGAAGTGA  
25  
26 In2Ex2REV CCCTTGGCTTTATGGGAAAAC  
27  
28  
29 In2Ex3FWD AATGATCAACCCAGCACTATCTGATA  
30  
31  
32 In2Ex3REV CGCTGTATTGTCATTGCAGTTGAG  
33  
34 Ex3In3FWD TTGCCTCAACTGCAATGACAA  
35  
36 Ex3In3REV AATTCAAACCGGCTGACTCTGA  
37  
38  
39 In3Ex4FWD CTGTGGAGCAGGCATCTTCA  
40  
41 In3Ex4REV ATCCAGCATCGGTGAGCATAT  
42  
43  
44 Ex4In4FWD ACCGATGTCAGCCAGGCTT  
45  
46 Ex4In4REV TAGCTGAACATGACATGGAAAGTAACTC  
47  
48  
49 In4Ex5FWD CACTGCCCCACTGGCTTAAATA  
50  
51 In4Ex5REV TCTCCAGTGACGGCTGGTTT  
52  
53  
54 Ex5In5FWD GGCATCTCTGGACCCTGTGATT  
55  
56 Ex5In5REV TTTGTTTGTTTTTTAAGCTCAGCCTTT  
57  
58  
59  
60

1  
2  
3 In5Ex6FWD GGAGGTCAGAGGTTGTATGTAAACCTT  
4  
5 In5Ex6REV GTGGACACTGAAGTCGGCAGA  
6  
7  
8 Ex6In6FWD GTGCCGACCAGGCTACTATCAT  
9  
10 Ex6In6REV TGCATGTGATGGGACAGCTTT  
11  
12 In6Ex7FWD TAGGAGTGA CTGGGAATTCTGAA  
13  
14 In6Ex7REV ACGAAATAGACGGGGTCTGATCTT  
15  
16  
17 Ex7In7FWD GTTGAAGGCGGTT CAGAGAA  
18  
19 Ex7In7REV CCTGGATGGCTCTACAGTGTCAT  
20  
21 In7Ex8FWD TCTTTGGAGCTACTTACACAGCCAA  
22  
23 In7Ex8REV GTGATCCACAGGGAAGTGTCTT  
24  
25  
26 Ex8In8FWD GCCGTCTGCCTACGATGTGAT  
27  
28 Ex8In8REV TCTCTCCCCATGCCTGTGAA  
29  
30  
31 In8Ex9FWD ACGGACACACCCTCTACTGCTT  
32  
33 In8Ex9REV GATCAGGAGGGCTGTGAGGTT  
34  
35  
36 Ex9In9FWD ACTGGAGTCCCCAGCTGAGTTA  
37  
38 Ex9In9REV TGCTAGAGAAACATTCCTGGTAGGAA  
39  
40  
41 In9Ex10RFWD CAGCACCCGGGCATAGAA  
42  
43 In9Ex10REV GCAGGGCATA CACAACGTTCA  
44  
45  
46 Ex10In10FWD CTGGTTACAAAAGAGATTCGGCAA  
47  
48 Ex10In10REV TCATTTCCATAATGAAAAGAGGTCAA  
49  
50  
51 In10Ex11FWD TGTGACGCGTAAGGCTGAGAT  
52  
53 In10Ex11REV CTCTGTCTCAGGCATCACTGAACA  
54  
55 Ex11In11FWD CTGTCACAATGGGTT CAGCTGTT  
56  
57  
58  
59  
60

1  
2  
3 Ex11In11REV CCAGTCATAGCTCAGACACCACATA  
4  
5 In11Ex12FWD AGCCACACCCACTCCAACAA  
6  
7 In11Ex12REV GGCCGTGTTGTAGATACATTTCAA  
8  
9 Ex12In12FWD ACCAGTTGACAGGCAGATGCTT  
10  
11 Ex12In12REV AGCCGGTCTGGTCATGGAA  
12  
13 In12EX13FWD GAGCGCACACACATGGATCA  
14  
15 In12EX13REV ACTTGATTGTAGCAAGCAGGACAA  
16  
17 EX13In13FWD GAGCCTGGAGAGTGTCGAGGT  
18  
19 EX13In13REV ATCTCCATATCTAAATCTATGTCAATACCCAT  
20  
21 In13Ex14FWD ATTAGAAGATGATTTGCCAAGGTCATT  
22  
23 In13Ex14REV TGAAATCTGAGCTTCTCTTAGAATGTCTC  
24  
25 Ex14In14FWD CTGGAGGCCCTGGTTTCAA  
26  
27 EX14In14REW ACTGATGCAGAATGACCGTGTTAA  
28  
29 In14Ex15FWD GGAGGCCAACTGCTTATCAGCTA  
30  
31 In14Ex15REW GCCAGACTCAGGCGCATCT  
32  
33 Ex15In15FWD AGACCCGCCTGGATGACCT  
34  
35 Ex15In15REW GTATAATGCAGTTCCACGGGAAA  
36  
37 In15Ex16FWD ATCCATTTTACAAAGACTTCTCTTGAAAT  
38  
39 In15Ex16REW GTCTGCCAATCTTGTAGCCTCCT  
40  
41 Ex16In16FWD CCATTCTTCTGAGCACCCGAAT  
42  
43 Ex16In16REW AGAAAGCTGGAAGGGAACACTTTC  
44  
45 In16Ex17FWD CCAGAAGGGTAGCCCTGTGA  
46  
47 In16Ex17REW TTGTACCACGGAGCTGTCCAA  
48  
49  
50  
51  
52  
53  
54  
55  
56  
57  
58  
59  
60

1  
2  
3 Ex17In17FWD AGTCAGCTAACGCAATGAAGCAA  
4  
5 EX17In17REW CATTTCACAGCACAGTAGTCAGTT  
6  
7  
8 In17Ex18FWD GTTCTTGGAGGCAGGATAGCAGTAA  
9  
10 In17Ex18REW AGGACAGATCACTGACTCCCTGAAG  
11  
12  
13 Ex18In18FWD CCAAGTCCCTGAGCCAGCA  
14  
15 Ex18In18REW GTACTGTGCCTTTAACCGTCTGAA  
16  
17  
18 In18Ex19FWD TTCTTGGGAGTTGTACTGCCTATCTT  
19  
20 In18Ex19REW CTGTCTCCTATCCTTTCCAGTCTGTAA  
21  
22  
23 Ex19In19FWD GTGGAAGCAAAGAGGATCAGACAA  
24  
25 Ex19In19REW TTCCTAGGTTCAAATGCTGACTCAAT  
26  
27 In19Ex20FWD GTGGAAAGAGTTGTAGACTTTCCTCTAAA  
28  
29 In19Ex20REW CTCGGAGGTTCTTCAGGATGTTCT  
30  
31  
32 Ex20In20FWD GCTTTCCTGCGCAACCTT  
33  
34 Ex20In20REW GATCAGAACTCAGGACTCCTAGCACTT  
35  
36 In20Ex21FWD TGACAGCTCCCTCAGTGGCT  
37  
38 In20Ex21REW GCCTCCCTAGCTGCGTTCTTT  
39  
40  
41 Ex21In21FWD CCTCTATTAGCCAGAAGGTTGCAGAT  
42  
43 Ex20In20REW GAACATGGAATATGGTGTATTAGCTGCTA  
44  
45 In21Ex22REW CCGTGTCTTATCCGTGTCAAA  
46  
47  
48 Ex22In23FWD ATAGGGAGTCTGAACTTGGAAGCTAAT  
49  
50 Ex22In23REW GATACAAGTGCTCAGTGACTCATCTTAGA  
51  
52  
53 In23Ex24FWD AGCACAGATGCAGGCCTCAT  
54  
55 In23Ex24REW ACTGATGCAGAATGACCGTGTTAA  
56  
57  
58  
59  
60

1  
2  
3 EcoLTRFWD1 ACCCCTTCATAAGGCTTAGCCAG  
4

5 EcoLTRREV1 GGAACCTTGAGACAGTTTCTGGG  
6

7  
8 LTRF1 AACCAATCAGCTCGCTTCTC  
9

10 LTRR1 TGGGCAGTCAATCACTCTGA  
11  
12  
13  
14  
15  
16  
17  
18  
19  
20  
21  
22  
23  
24  
25  
26  
27  
28  
29  
30  
31  
32  
33  
34  
35  
36  
37  
38  
39  
40  
41  
42  
43  
44  
45  
46  
47  
48  
49  
50  
51  
52  
53  
54  
55  
56  
57  
58  
59  
60

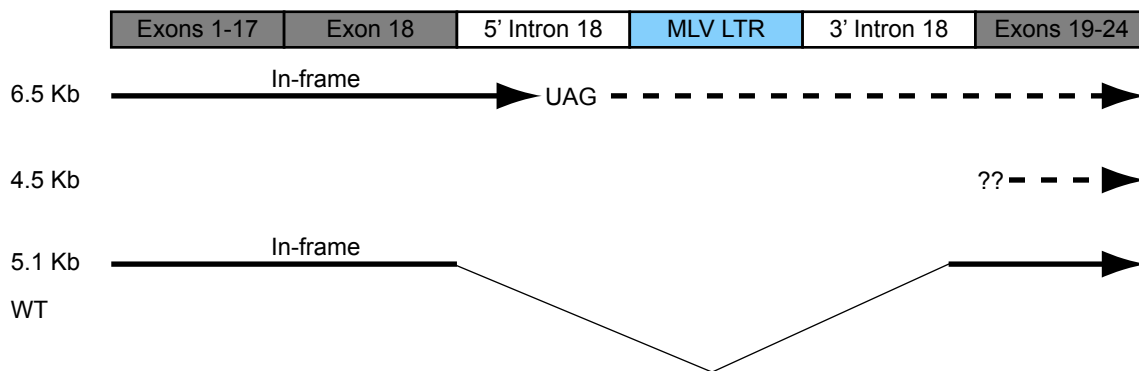

**Supp. Fig. 1. Proposed mechanism for *Lamc2*<sup>jeb</sup> mutation.** Schematic representation of aberrant and normal *Lamc2*<sup>jeb</sup> transcripts. The MLV LTR insertion into intron 18 results in 3 transcripts. The aberrant 6.5 kb transcript includes intron 18 + the MLV LTR. This introduces a translational stop and an extended untranslated region but does not compromise transcript stability. The MLV LTR additionally results in an aberrant 4.5 kb transcript initiating after exon 17 along with a properly spliced WT 5.1 kb transcript in low abundance.



EXON 18  
 CAG GGA GTC AGT GAT CTG TCC TTT CAG INTRON 18  
 Q V G S D L S F Q V V R P L I L C  
 GCA TGC CAC CCG GAC AAA TGG ACA CAG AGA CTT TCT TCT CTA TAG ATC GCA  
 A C H P D K W T Q R L S S L \*  
 GAA GAT TGT TCA ACT TTA CAG CTT CTT CTT CAC AAT GGC TGT GTC AGG CAG  
 TGT CAC ATT GCT CAT TAC TTA TTA GGG GAA AGA GGT TCT TCT CTT TAG TGT  
 TTC AGA CGG TTA AAG GCA CAG TAC CTG CGT TGG TTC TGT CCT GCT AAG GGC  
 AGC AGA GTC TCA GGA GGA CAG AGG AAA TGA TCG GCA AGT GTG CAC AAT GTC  
 TTT AGA GCT CAC ATG GTC TAG AGG CCT CCT ACA CCC CAC AAA GGC TTC CCA  
 TCA CAC ACA CAC ACA CAT ACC CCA GCA CCC ATG TCA ACC AGA TGA ACA CGT  
 ATT AGC ACA TGG CTG ATA GCC CGT GTT TAA AAC CTA GCA TGG ACT TTG GGC  
 TTG GTG TTA GGA AGA GAC AGT TGC TTC CTG TCA TCT GTT GTC TAG ACT CTG  
 AAA GGG AAA ATG ACT TGC ATG TTT AAT CTT GAA CCC CTT AGT CAA GGA AAG  
 TTT TAT GCC TCC TCC CCA GTT CTT TTT TTT TTT GAG ACC CTC AAA TTG AAT  
 TTT AAT GGA GTT CGA TAC ATC CAT TTG ATA CTG CTA AGA AGA AGA CTT TTG  
 CTA TCA AAA AGC TTG CTT TTT TTT TTC TGC CAT CAA TCT CCC TAG CTA TTA  
 CAA CCT TAT TGG ATT AAG TTT ACC TGC ATA CCC AAC AGC TAA AGA CAC TCA  
 CAG TGA TCT CCA TAG AGA TAT GTT CTG TGA ATA GAT AAA GCA ATT GTT TTT  
 AAC AAC TTT TTT AAA AAA GAC CAG AGG CAG AGT TTA CTG TAT TCT TGG GAG  
 TTG TAC TGC CTA TCT TTC CTT GGT ACC CTG TCT CAT TTC TGG TAG GCT TTG  
 GGA CGT TAG GGC CAG **MLV LTR U3**  
 TGT CTG TGA AAG ACC CCT TCA TAA GGC TTA GCC AGC  
 TAA CTG CAG TAA CGC CAT CTT GCA AGG CAT GGG AAA ATA CCA GAG CTG ATG  
 TTC TCA GAA AAA CAA GAA CAA GGA AGT ACA GAG AGG CTG GAA AGT ACC GGG  
 ACT AAG GCC AAA CAG GAT ATC TGT GGT CAA GCA CTA GGG CCC CGG CCC AGG  
 GCC AAG AAC AGA TGG TCC CCA GAA ATA GCT AAA ACA ACA ACA GTT TCA AGA  
 GAC CCA GAA ACT GTC TCA AGG TTC CCC AGA TGA CCA GGG ATC AAC CCC AAG  
 CCT CAT TTA AAC TAA CCA ATC AGC TCG CTT CTC GCT TCT GTA CCC GCG CTT  
 ATT GCT GCC CAG CTC TAT AAA AAG GGT AAA AAC CCC ACA CTC GGC GCG CCA  
 GTC CTC CGA TAG ACT GAG TCG CCC GGG TAC CCG TGT ATC CAA TAA AGC CTT  
 TTG CTG TTG CAT CCG AAT CGT GGT CTC GCT GAT **U5**  
 CCT TGG GAG GGT CTC CTC  
 INTRON 18  
 AGA GTG ATT GAC TGC CCA GCT TGG GGG TCT TTC ATC TGC TTT CTT GGC TTC  
 TTA AGG CTG CCA GTA TTT TCA AAT GGT GAC AGT AGG TCC TGA AGC AGG TGT  
 GGT GAC GTG TGA GCA GAC AGT CAC ACT CAT TTG TAA CTT TGT GTC CAC AGG  
 EXON 19  
 TGG AAG CAG TGG AAG CAA AGA GGA TCA GAC AAA AGG CTG ATT CTC TCT CAA  
 ACC TGG TGA CCA GAC AAA CGG ATG CAT TCA CGC GTG TGC GAA ACA ATC TGG  
 GGA ACT GGG AAA AAG AAA CAC GGC AGC TTT TAC AGA CTG GAA AGG ATA GGA  
 GAC CA

**Supp. Fig. 2. Sequence analysis of the aberrant 6.5 kb transcript caused by the *Lamc2*<sup>ieb</sup> mutation.** cDNA and predicted amino acid sequence between exons 18 and 19. Exonic boundaries were predicted based on known *Lamc2* WT sequence. Highlighted sequences: Grey, Exonic; No highlight, intronic; Blue, MLV LTR U3, R and U5 regions; \* Site of premature TAG stop. Results are based on the amplified product of cDNA generated produced from oligo(dT) + random decamer primed RNA primers positioned in the MLV LTR and *Lamc2* exons.

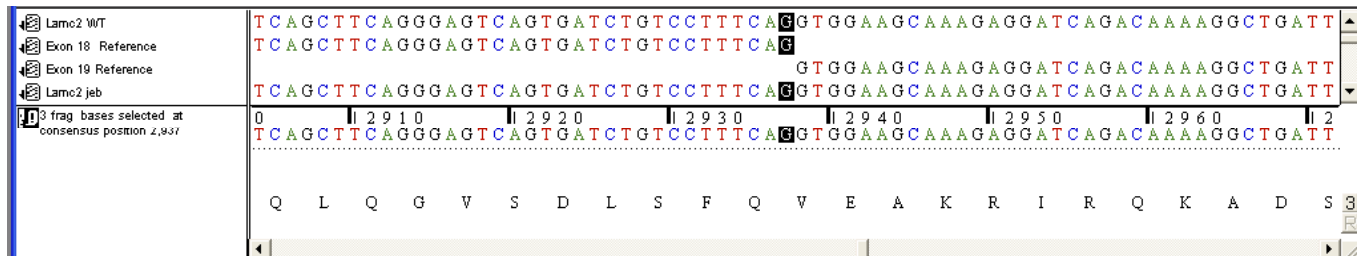

**Supp. Fig. 3. Detection of correctly spliced transcript from *Lamc2<sup>jeb</sup>* mice.**

cDNA sequences of the *Lamc2* wild type reference and *Lamc2<sup>jeb</sup>* at the junction of exon 18 to 19 are shown, as well as the translated product. The amplified product of cDNA was generated produced from oligo(dT) + random decamer primed RNA using primers positioned in exons 14 and 22.
